# Supplementary material for: Effects of seasonal and diel variations in thermal stratification on phytoplankton in a regulated river
Source: Research Square preprint supplement (doi:10.21203/rs.3.rs-2771590/v1), 2023-06-08
Supplement: Supplementary file 1 [file 216efb45fe30f664f5b37746.xlsx]

## Sheet: Sheet1
Table S3. Vertical distributions of cell densities for dominant and subdominant species from Chlorophyta, Bacillariophyta and Cyanobacteria
Upstream
0.5 m		November		April		May		August		September
		species	density (cells mL-1)	species	density (cells mL-1)	species	density (cells mL-1)	species	density (cells mL-1)	species	density (cells mL-1)
Chlorophyta	dominant	Planctonema lauterbornii	1428	Pediastrum duplex	3192	Pediastrum duplex var. gracilimum	335	Scenedesmus quadricauda	3780	Planctonema lauterbornii	1176
	subdominant	Stichococcus bacillaris	1092	Crucigenia sp.	420	Sphaerocystis schroeteri	84	Golenkinia sp.	2688	Koliella elongata	42
Bacillariophyta	dominant	Aulacoseira ambigua f. japonica	966	Aulacoseira ambigua	1134	Aulacoseira ambigua	1932	Navicula sp.	2646	Aulacoseira granulata	504
	subdominant	Aulacoseira ambigua	168	Aulacoseira ambigua f. japonica	420	Aulacoseira granulata var. angustissima	779	Aulacoseira muzzanensis	1218	0	0
Cyanobacteria	dominant	Aphanizomenon sp. 1	8148	Pseudanabaena limnetica	1722	Anabaena sp.	38	Microcystis wesenbergii	225500	Pseudanabaena mucicola	525
	subdominant	Aphanizomenon sp. 2	1714	0	0	0	0	Microcystis aeruginosa	24500	Microcystis sp.	512
3 m		November		April		May		August		September
		species	density (cells mL-1)	species	density (cells mL-1)	species	density (cells mL-1)	species	density (cells mL-1)	species	density (cells mL-1)
Chlorophyta	dominant	Stichococcus bacillaris	620	Stichococcus bacillaris	630	Sphaerocystis schroeteri	91	Scenedesmus quadricauda	2684	Planctonema lauterbornii	1854
	subdominant	Kirchneriella sp.	168	Planctonema lauterbornii	546	Oocystis sp.	42	Pediastrum sp.	1344	Koliella elongata	105
Bacillariophyta	dominant	Aulacoseira ambigua f. japonica	1964	Aulacoseira ambigua f. japonica	1690	Aulacoseira granulata var. angustissima	779	Navicula sp.	3100	Aulacoseira granulata	354
	subdominant	Stephanodiscus hantzschii	42	Aulacoseira ambigua	948	Aulacoseira ambigua f. japonica	210	Aulacoseira muzzanensis	2138	0	0
Cyanobacteria	dominant	Aphanizomenon sp. 1	3849	Pseudanabaena limnetica	532	Anabaena sp.	378	Microcystis wesenbergii	34688	Pseudanabaena mucicola	421
	subdominant	Pseudanabaena sp.	882	0	0	0	0	Microcystis aeruginosa	9245	Microcystis sp.	321
Bottom		November		April		May		August		September
		species	density (cells mL-1)	species	density (cells mL-1)	species	density (cells mL-1)	species	density (cells mL-1)	species	density (cells mL-1)
Chlorophyta	dominant	Stichococcus bacillaris	971	Pediastrum duplex	2908	Pediastrum duplex var. gracilimum	261	Scenedesmus quadricauda	2865	Planctonema lauterbornii	1761
	subdominant	Planctonema lauterbornii	287	Stichococcus bacillaris	595	Sphaerocystis schroeteri	45	Scenedesmus sp.	1176	Koliella elongata	201
Bacillariophyta	dominant	Aulacoseira ambigua	209	Aulacoseira ambigua f. japonica	774	Aulacoseira ambigua	1815	Navicula sp.	2984	Aulacoseira ambigua f. japonica	264
	subdominant	0	0	Cyclotella sp.	210	Aulacoseira granulata var. angustissima	675	Achnanthes sp.	504	0	0
Cyanobacteria	dominant	Aphanizomenon sp. 1	663	0	0	Anabaena sp.	81	Microcystis wesenbergii	9548	Microcystis sp.	85
	subdominant	Aphanizomenon sp. 2	539	0	0	0	0	Microcystis aeruginosa	7211	0	0
Midstream
0.5 m		November		April		May		August		September
		species	density (cells mL-1)	species	density (cells mL-1)	species	density (cells mL-1)	species	density (cells mL-1)	species	density (cells mL-1)
Chlorophyta	dominant	Stichococcus bacillaris	2814	Pediastrum duplex var. gracilimum	2394	Coelastrum sp.	94	Pediastrum biwae	1302	Chlorella vulgaris	2856
	subdominant	Schroederia setigera	672	Monoraphidium griffithii	1512	Actinastrum sp.	67	Scenedesmus quadricauda	120	Stichococcus bacillaris	2730
Bacillariophyta	dominant	Aulacoseira ambigua f. japonica	1344	Aulacoseira ambigua	8442	Aulacoseira ambigua	4746	Nitzschia sp.	42	Cyclotella atomus(5um)	2226
	subdominant	Melosira varians	504	Cyclotella sp.	756	Aulacoseira granulata	3370	0	0	Aulacoseira alpigena	1428
Cyanobacteria	dominant	Aphanizomenon flos-aquae	62916	Aphanizomenon sp.	196	Aphanizomenon sp.	252	Microcystis wesenbergii	47872	Oscilatoria sp.	198
	subdominant	Aphanizomenon sp.	7182	0	0	Anabaena sp.	147	Microcystis aeruginosa	6528	Microcystis sp.	95
3 m		November		April		May		August		September
		species	density (cells mL-1)	species	density (cells mL-1)	species	density (cells mL-1)	species	density (cells mL-1)	species	density (cells mL-1)
Chlorophyta	dominant	Stichococcus bacillaris	2286	Pediastrum duplex var. gracilimum	3896	Pediastrum simplex	260	Pediastrum biwae	1302	Chlorella vulgaris	3769
	subdominant	Schroederia setigera	768	Chlorella vulgaris	756	0	0	Staurastrum cingulum	84	Stichococcus bacillaris	2648
Bacillariophyta	dominant	Aulacoseira ambigua	1465	Aulacoseira ambigua	9655	Aulacoseira ambigua	5965	Aulacoseira ambigua f. japonica	343	Cyclotella atomus(5um)	5789
	subdominant	Aulacoseira ambigua f. japonica	898	Aulacoseira ambigua f. japonica	630	Aulacoseira ambigua f. japonica	3276	0	0	Aulacoseira alpigena	1347
Cyanobacteria	dominant	Aphanizomenon flos-aquae	15492	Aphanizomenon sp.	85	Aphanizomenon sp.	66	Microcystis wesenbergii	1436.16	0	0
	subdominant	Aphanizomenon sp.	3648	0	0	0	0	Microcystis aeruginosa	130	0	0
Bottom		November		April		May		August		September
		species	density (cells mL-1)	species	density (cells mL-1)	species	density (cells mL-1)	species	density (cells mL-1)	species	density (cells mL-1)
Chlorophyta	dominant	Coelastrum sp.	942	Chlorella vulgaris	1965	Actinastrum sp.	101	Scenedesmus quadricauda	504	Chlorella vulgaris	1736
	subdominant	Stichococcus bacillaris	654	Monoraphidium griffithii	668	0	0	Pediastrum biwae	462	Stichococcus bacillaris	375
Bacillariophyta	dominant	Aulacoseira ambigua	949	Aulacoseira ambigua	12657	Aulacoseira ambigua	3645	Aulacoseira ambigua	630	Aulacoseira ambigua	2740
	subdominant	Aulacoseira ambigua f. japonica	481	Aulacoseira ambigua f. japonica	898	Aulacoseira ambigua f. japonica	1652	Aulacoseira ambigua f. japonica	378	Aulacoseira ambigua f. japonica	3318
Cyanobacteria	dominant	Aphanizomenon sp.	2894	0	0	0	0	Microcystis wesenbergii	957.44	0	0
	subdominant	Aphanizomenon flos-aquae	1659	0	0	0	0	0	0	0	0
Downstream
0.5 m		November		April		May		August		September
		species	density (cells mL-1)	species	density (cells mL-1)	species	density (cells mL-1)	species	density (cells mL-1)	species	density (cells mL-1)
Chlorophyta	dominant	monoraphidium griffithii	140	Chlorella vulgaris	8876	Pediastrum tetras	336	Coelastrum sp.	1638	Planctonema lauterbornii	2296
	subdominant	Closteriopsis sp.	126	Dictyosphaerium	1358	Micractinium sp.	224	Pediastrum simplex	1344	Coelastrum sp.	210
Bacillariophyta	dominant	Fragilaria crotonensis	826	Cyclotella sp.	1162	Aulacoseira ambigua	1428	Aulacoseira granulata	854	Aulacoseira ambigua f. japonica	672
	subdominant	Aulacoseira granulata var. angustissima	252	Aulacoseira ambigua	1050	Aulacoseira ambigua f. japonica	980	Nitzschia acicularis	84	Aulacoseira granulata	182
Cyanobacteria	dominant	Microcystis sp.	42	Pseudanabaena limnetica	322	Microcystis sp. 1	126	Microcystis wesenbergii	10248	Aphanocapsa sp. 1	420
	subdominant	0	0	0	0	Microcystis sp. 2	126	Microcystis sp.	2016	0	0
3 m		November		April		May		August		September
		species	density (cells mL-1)	species	density (cells mL-1)	species	density (cells mL-1)	species	density (cells mL-1)	species	density (cells mL-1)
Chlorophyta	dominant	Chlamydomonas sp.	336	Chlorella vulgaris	13888	Chlamydomonas sp.	42	Pediastrum simplex	1386	Planctonema lauterbornii	1820
	subdominant	monoraphidium griffithii	168	Monoraphidium griffithii	1806	monoraphidium griffithii	28	Scenedesmus quadricauda	504	Coelastrum sp.	336
Bacillariophyta	dominant	Aulacoseira granulata	924	Aulacoseira ambigua	5936	Aulacoseira ambigua	1148	Aulacoseira granulata	462	Fragilaria crotonensis	420
	subdominant	Aulacoseira ambigua	140	Aulacoseira granulata	322	Aulacoseira ambigua f. japonica	700	0	0	Aulacoseira alpigena	364
Cyanobacteria	dominant	Oscillatoria limnetica	336	Aphanocapsa sp. 1	3486	Microcystis sp. 1	98	Microcystis wesenbergii	9996	Aphanizomenon klebahni	13300
	subdominant	Aphanocapsa sp.	112	Aphanocapsa sp. 2	126	0	0	Microcystis sp.	2772	Aphanizomenon issatschenkoi	2100
Bottom		November		April		May		August		September
		species	density (cells mL-1)	species	density (cells mL-1)	species	density (cells mL-1)	species	density (cells mL-1)	species	density (cells mL-1)
Chlorophyta	dominant	monoraphidium griffithii	84	Chlorella vulgaris	3654	Pediastrum simplex	294	Pediastrum simplex	1344	Planctonema lauterbornii	1792
	subdominant	Chlamydomonas sp.	42	Monoraphidium griffithii	938	Micractinium sp.	140	0	0	Pediastrum simplex	476
Bacillariophyta	dominant	Aulacoseira granulata	1134	Cyclotella sp.	112	Aulacoseira ambigua	3080	Aulacoseira granulata	588	Aulacoseira ambigua f. japonica	1085
	subdominant	Aulacoseira alpigena	630	0	0	Aulacoseira ambigua f. japonica	1974	Aulacoseira granulata var. angustissima	462	Aulacoseira granulata var. angustissima	350
Cyanobacteria	dominant	0	0	0	0	Aphanizomenon sp.	1400	Microcystis sp. 1	4200	Oscillatoria limnetica	448
	subdominant	0	0	0	0	0	0	Microcystis sp. 2	966	0	0
