# Supplementary material for: Effects of seasonal and diel variations in thermal stratification on phytoplankton in a regulated river
Source: Research Square preprint supplement (doi:10.21203/rs.3.rs-2771590/v1), 2023-06-08
Supplement: Supplementary file 2 [file 98b28cb66e436eb84df9b895.docx]

**Supplementary materials**


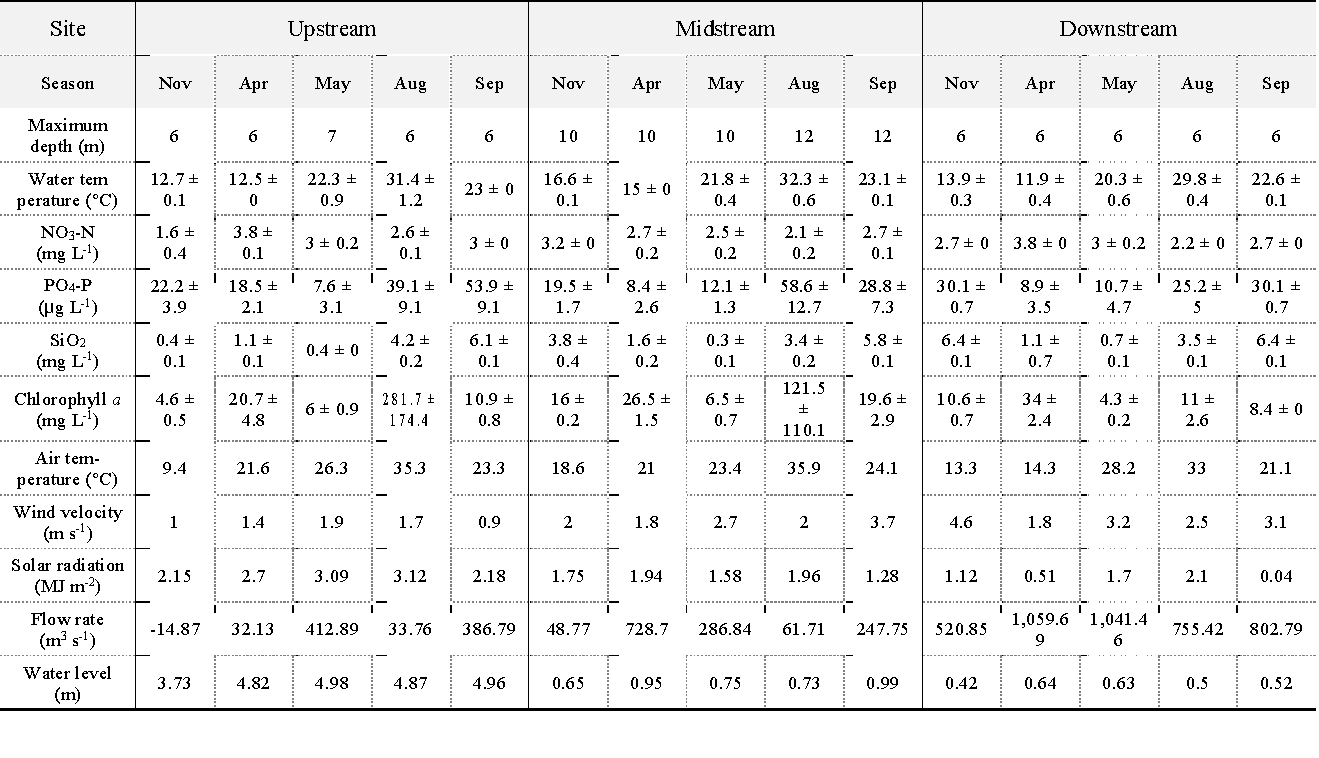


**Table S1: Depth-averaged water characteristics and environmental factors of three sites during the study period (n = 3, mean ± S.E.).**

|  | **Seasonal** | | | | **Diel** | | | |
| --- | --- | --- | --- | --- | --- | --- | --- | --- |
|  | PC1 | PC2 | r2 | *P*-value | PC1 | PC2 | r2 | *P*-value |
| RWCS | 0.684 | **-0.729** | 0.729 | 0.002 | 0.515 | **0.857** | 0.758 | 0.001 |
| S | **0.895** | -0.447 | 0.501 | 0.011 | -**0.874** | 0.486 | 0.777 | 0.001 |
| Max | 0.561 | **-0.828** | 0.682 | 0.003 | 0.414 | **0.910** | 0.779 | 0.001 |
| AT | **0.964** | -0.268 | 0.699 | 0.002 | -0.144 | **0.990** | 0.921 | 0.001 |
| SR | 0.330 | **-0.944** | 0.743 | 0.002 | 0.242 | **0.970** | 0.864 | 0.001 |
| WV | -0.102 | 0.995 | 0.285 | 0.141 | -0.103 | **0.995** | 0.694 | 0.001 |
| FR | -0.641 | 0.768 | 0.252 | 0.184 | -0.672 | **-0.741** | 0.593 | 0.002 |
| WL | 0.246 | **-**0.969 | 0.413 | 0.052 | **1.000** | -0.014 | 0.970 | 0.001 |
| WT0 | **0.997** | -0.079 | 0.875 | 0.001 | -0.060 | **0.998** | 0.848 | 0.001 |
| WT3 | **1.000** | 0.031 | 0.893 | 0.001 | **-0.885** | 0.466 | 0.415 | 0.015 |
| WTB | **0.998** | 0.064 | 0.878 | 0.001 | **-0.998** | 0.057 | 0.734 | 0.001 |
| Chl0 | **0.884** | -0.467 | 0.658 | 0.003 | 0.468 | **0.884** | 0.538 | 0.002 |
| Chl3 | 0.828 | -0.561 | 0.361 | 0.066 | 0.686 | **0.728** | 0.646 | 0.001 |
| ChlB | -0.949 | -0.315 | 0.082 | 0.619 | **0.993** | -0.122 | 0.471 | 0.005 |
| NO0 | -0.977 | -0.215 | 0.143 | 0.376 | 0.914 | -0.406 | 0.179 | 0.251 |
| NO3 | -0.993 | -0.116 | 0.231 | 0.184 | 0.653 | 0.757 | 0.267 | 0.108 |
| NOB | -0.806 | 0.593 | 0.136 | 0.4 | -0.546 | 0.838 | 0.022 | 0.855 |
| PO0 | **1.000** | 0.009 | 0.673 | 0.002 | -0.547 | 0.837 | 0.254 | 0.109 |
| PO3 | **0.902** | 0.432 | 0.552 | 0.007 | -0.869 | 0.495 | 0.147 | 0.325 |
| POB | **0.864** | 0.503 | 0.629 | 0.004 | **-0.969** | 0.246 | 0.533 | 0.004 |
| SI0 | 0.536 | **0.844** | 0.862 | 0.001 | **0.917** | -0.400 | 0.881 | 0.001 |
| SI3 | 0.447 | **0.894** | 0.803 | 0.001 | **0.934** | -0.356 | 0.888 | 0.001 |
| SIB | 0.551 | **0.835** | 0.878 | 0.002 | **0.753** | -0.658 | 0.744 | 0.001 |

**Table S2: Pearson correlation coefficient of determination (r2) and *P*-values based on random permutations between the environmental variables and the PC coordinates at seasonal and diel scales (n = 15: seasonal, 18: diel). The bold values statistical significance (*P* < 0.05**
